# Supplementary material for: Binding modes of environmental endocrine disruptors to human serum albumin: insights from STD-NMR, ITC, spectroscopic and molecular docking studies
Source: PubMed Central journal article supplement (PMC5593971; doi:10.1038/s41598-017-11604-3), 2017-09-11
Supplement: 41598_2017_11604_MOESM1_ESM.pdf [file 41598_2017_11604_MOESM1_ESM.pdf]

## Supplementary Information

### **Binding modes of environmental endocrine disruptors to human serum albumin: insights from STD-NMR, ITC, spectroscopic and molecular docking studies**

Hongqin Yang<sup>1</sup>, Yanmei Huang<sup>1</sup>, Jiuyang Liu<sup>2</sup>, Peixiao Tang<sup>1\*</sup>, Qiaomei Sun<sup>1</sup>, Xinnuo Xiong<sup>1</sup>, Bin Tang<sup>1</sup>, Jiawei He<sup>1</sup>, Hui Li<sup>1\*</sup>

<sup>1</sup>College of Chemical Engineering, Sichuan University, Chengdu 610065, China.

<sup>2</sup>School of Life Sciences, University of Science and Technology of China, Hefei 230026, China.

\*These authors contributed equally to this work.

Correspondence and requests for materials should be addressed to P.-X.T (email: tangpeixiao@126.com) or H.L. (email: lihuilab@sina.com)

Table S1. Relative degrees of saturation of protons in STD-NMR spectra for BPB and BPE. The proton of H1/3/10/12 with the strongest STD effect was assigned with a value of 100%.

| Hydrogen             | H1/3/10/12 | H4/6/9/13 | H14 | H15 | H16 |
|----------------------|------------|-----------|-----|-----|-----|
| BPB-R <sub>STD</sub> | 100        | 61        | 25  | 59  | 55  |
| BPE-R <sub>STD</sub> | 100        | 73        | 54  | -   | -   |

Table S2 Three-dimensional fluorescence spectral parameters of HSA alone and in the presence of BPB/BPE.

| System  | Peak No. | Peak position [ $\lambda_{\text{ex}}/$<br>$\lambda_{\text{em}}$ (nm/nm)] | $\Delta\lambda$ (nm) | Intensity     |
|---------|----------|--------------------------------------------------------------------------|----------------------|---------------|
| HSA     | A        | 280/280→350/350                                                          | 0                    | 212.99→307.99 |
|         | 1        | 280/338                                                                  | 58                   | 621.95        |
|         | 2        | 225/332                                                                  | 107                  | 710.67        |
| HSA–BPB | A        | 280/280→350/350                                                          | 0                    | 192.86→300.76 |
|         | 1        | 280/337                                                                  | 57                   | 633.01        |
|         | 2        | 225/330                                                                  | 105                  | 662.56        |
| HSA–BPE | A        | 280/280→350/350                                                          | 0                    | 194.09→333.07 |
|         | 1        | 280/333                                                                  | 53                   | 647.29        |
|         | 2        | 225/334                                                                  | 109                  | 692.05        |

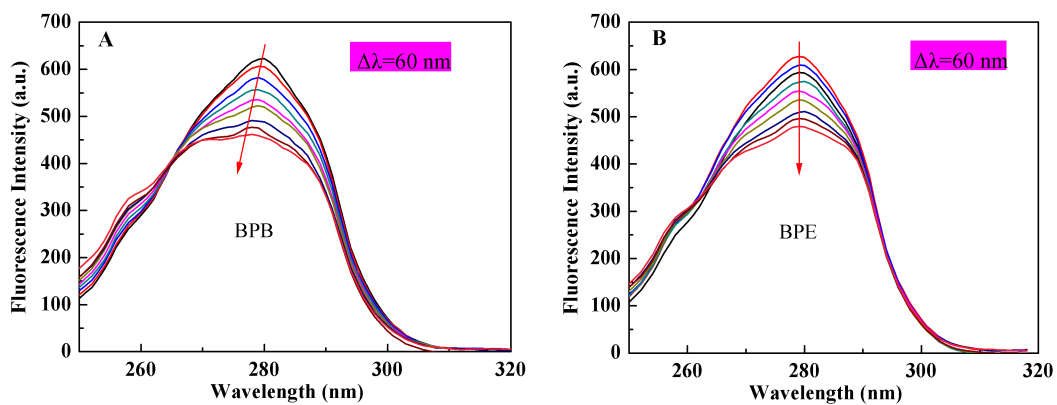

**Supplementary Figure 1.** Synchronous fluorescence spectra of HSA in the presence of different concentrations of BPB (A) and BPE (B) at  $\Delta\lambda = 60$  nm. Concentrations of BPB/BPE were in the range of 0–120  $\mu\text{M}$ .
